# Supplementary material
Source: PubMed Central journal article supplement (PMC7309278)
Supplement: NIHMS1586138-supplement-Supplementary_Information.pdf [file NIHMS1586138-supplement-Supplementary_Information.pdf]

In the format provided by the authors and unedited.

# Fatal demyelinating disease is induced by monocyte-derived macrophages in the absence of TGF- $\beta$ signaling

Harald Lund<sup>1</sup>, Melanie Pieber<sup>1,7</sup>, Roham Parsa<sup>1,7</sup>, David Grommisch<sup>1</sup>, Ewoud Ewing<sup>2</sup>, Lara Kular<sup>2</sup>, Jinming Han<sup>1</sup>, Keying Zhu<sup>1</sup>, Jik Nijssen<sup>3</sup>, Eva Hedlund<sup>3</sup>, Maria Needhamsen<sup>2</sup>, Sabrina Ruhrmann<sup>2</sup>, André Ortlieb Guerreiro-Cacais<sup>2</sup>, Rasmus Berglund<sup>2</sup>, Maria J. Forteza<sup>4</sup>, Daniel F. J. Ketelhuth<sup>4</sup>, Oleg Butovsky<sup>5,6</sup>, Maja Jagodic<sup>2</sup>, Xing-Mei Zhang<sup>1,8</sup> and Robert A. Harris<sup>1,8\*</sup>

<sup>1</sup>Department of Clinical Neuroscience, Applied Immunology and Immunotherapy, Karolinska Institutet, Center for Molecular Medicine, Karolinska Hospital at Solna, Stockholm, Sweden. <sup>2</sup>Department of Clinical Neuroscience, Center for Molecular Medicine, Karolinska Institutet, Stockholm, Sweden. <sup>3</sup>Department of Neuroscience, Karolinska Institutet, Stockholm, Sweden. <sup>4</sup>Department of Medicine, Cardiovascular Medicine Unit, Center for Molecular Medicine, Karolinska Institutet, Stockholm, Sweden. <sup>5</sup>Department of Neurology, Ann Romney Center for Neurologic Diseases, Brigham and Women's Hospital, Harvard Medical School, Boston, MA, USA. <sup>6</sup>Evergrande Center for Immunologic Diseases, Brigham and Women's Hospital, Harvard Medical School, Boston, MA, USA. <sup>7</sup>These authors contributed equally: Melanie Pieber, Roham Parsa. <sup>8</sup>These authors jointly supervised this work: Xing-Mei Zhang, Robert A. Harris. \*e-mail: [robert.harris@ki.se](mailto:robert.harris@ki.se)

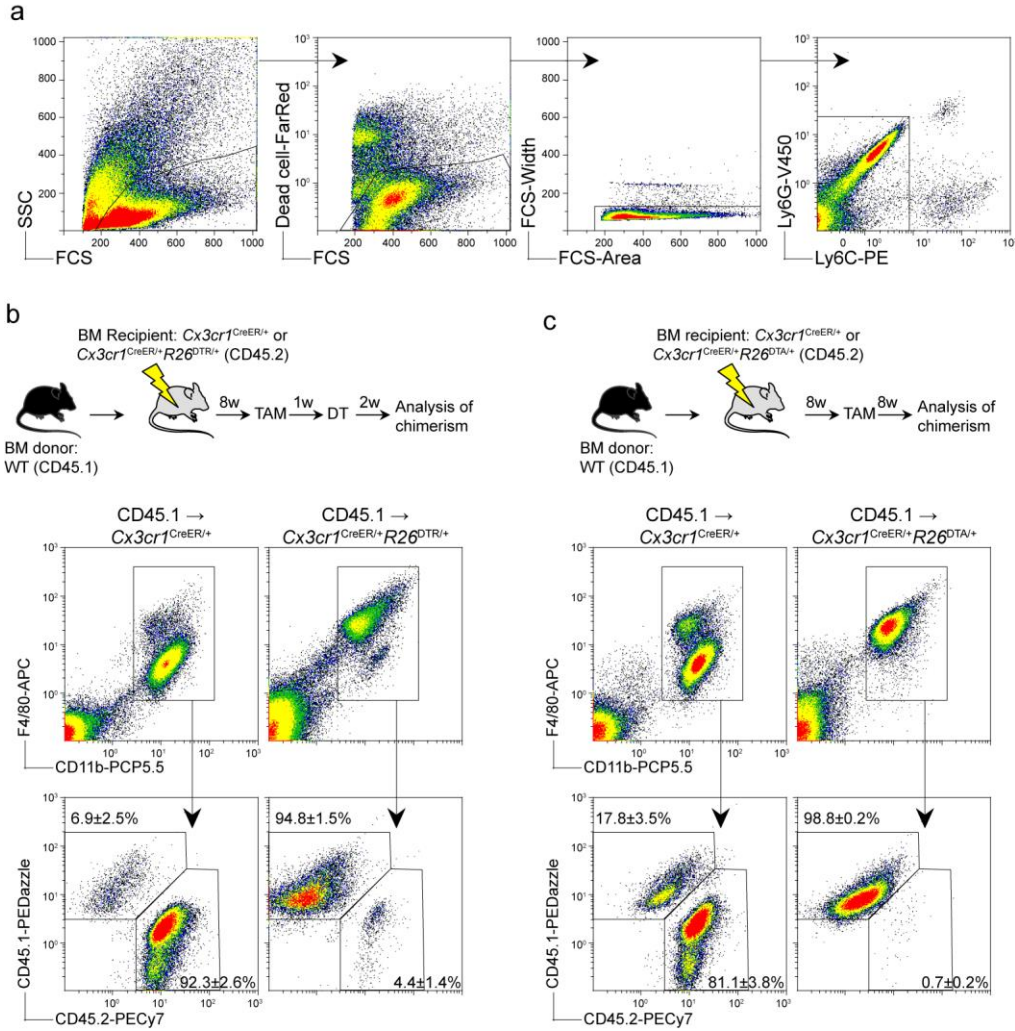

### Supplementary Figure 1

Repopulation of microglia by peripheral myeloid cells in chimeric *Cx3cr1*<sup>CreER/+</sup> *R26*<sup>DTR/+</sup> and *Cx3cr1*<sup>CreER/+</sup> *R26*<sup>DTA/+</sup> mice  
**(a)** Gating strategy of CNS cells employed in the study. **(b-c)** Analysis of CNS, top panel gated on live, singlet and Ly6C<sup>+</sup>Ly6G<sup>+</sup> cells in **(b)** CD45.1→*Cx3cr1*<sup>CreER/+</sup> *R26*<sup>DTR/+</sup> and **(c)** CD45.1→*Cx3cr1*<sup>CreER/+</sup> *R26*<sup>DTA/+</sup> chimeras. Values in dot plots are mean±s.d. of **(b)** n=5 and 6 mice from two pooled experiments and **(c)** n=5 mice/group from one of two independent experiments.

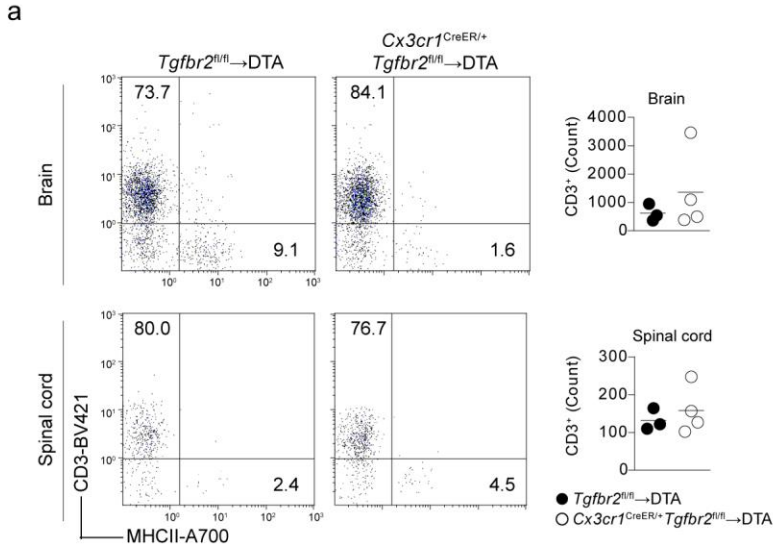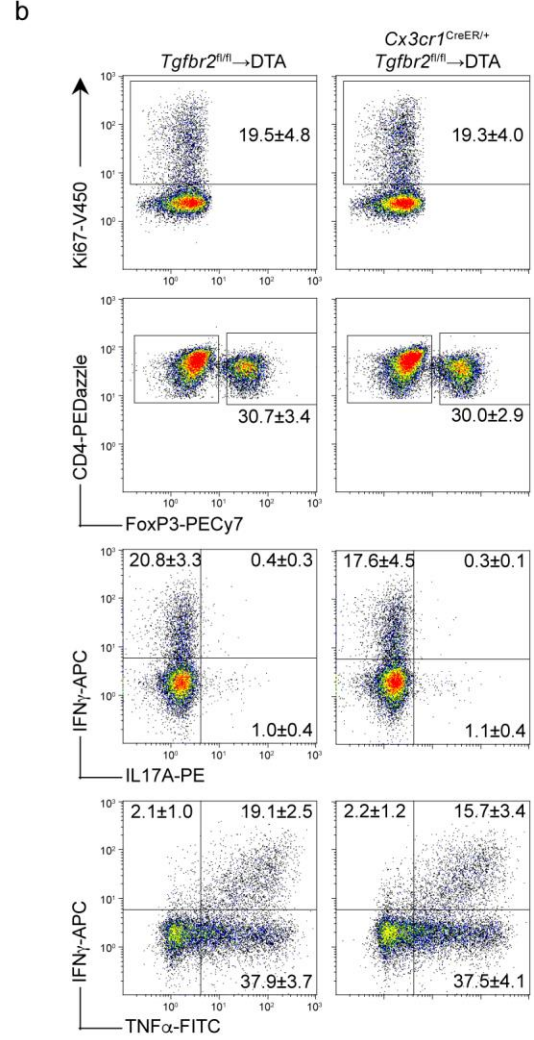

## Supplementary Figure 2

Lack of adaptive immunological changes in *Cx3cr1<sup>CreER/+</sup> Tgfb2<sup>fl/fl</sup> → DTA* chimeras

(a) Analysis of T cell (CD11b<sup>-</sup>CD45<sup>hi</sup>CD3<sup>+</sup>) and B cell (CD11b<sup>-</sup>CD45<sup>hi</sup>MHCII<sup>+</sup>) numbers in the brain and spinal cord of the indicated chimeras at day 20 after TAM. Lines in graphs represent mean values of n=3 and 4 mice. The experiment was performed once. (b) Analysis of proliferating T cells, CD4<sup>+</sup>FoxP3<sup>+</sup> regulatory T cells and IFN- $\gamma$ , IL-17 and TNF- $\alpha$  producing CD4<sup>+</sup> T cells in the spleens of the indicated chimeras after onset of motor symptoms (day 20 after TAM). Values in plots are mean $\pm$ s.d. of n=6 and 5 mice. The experiment was performed once.

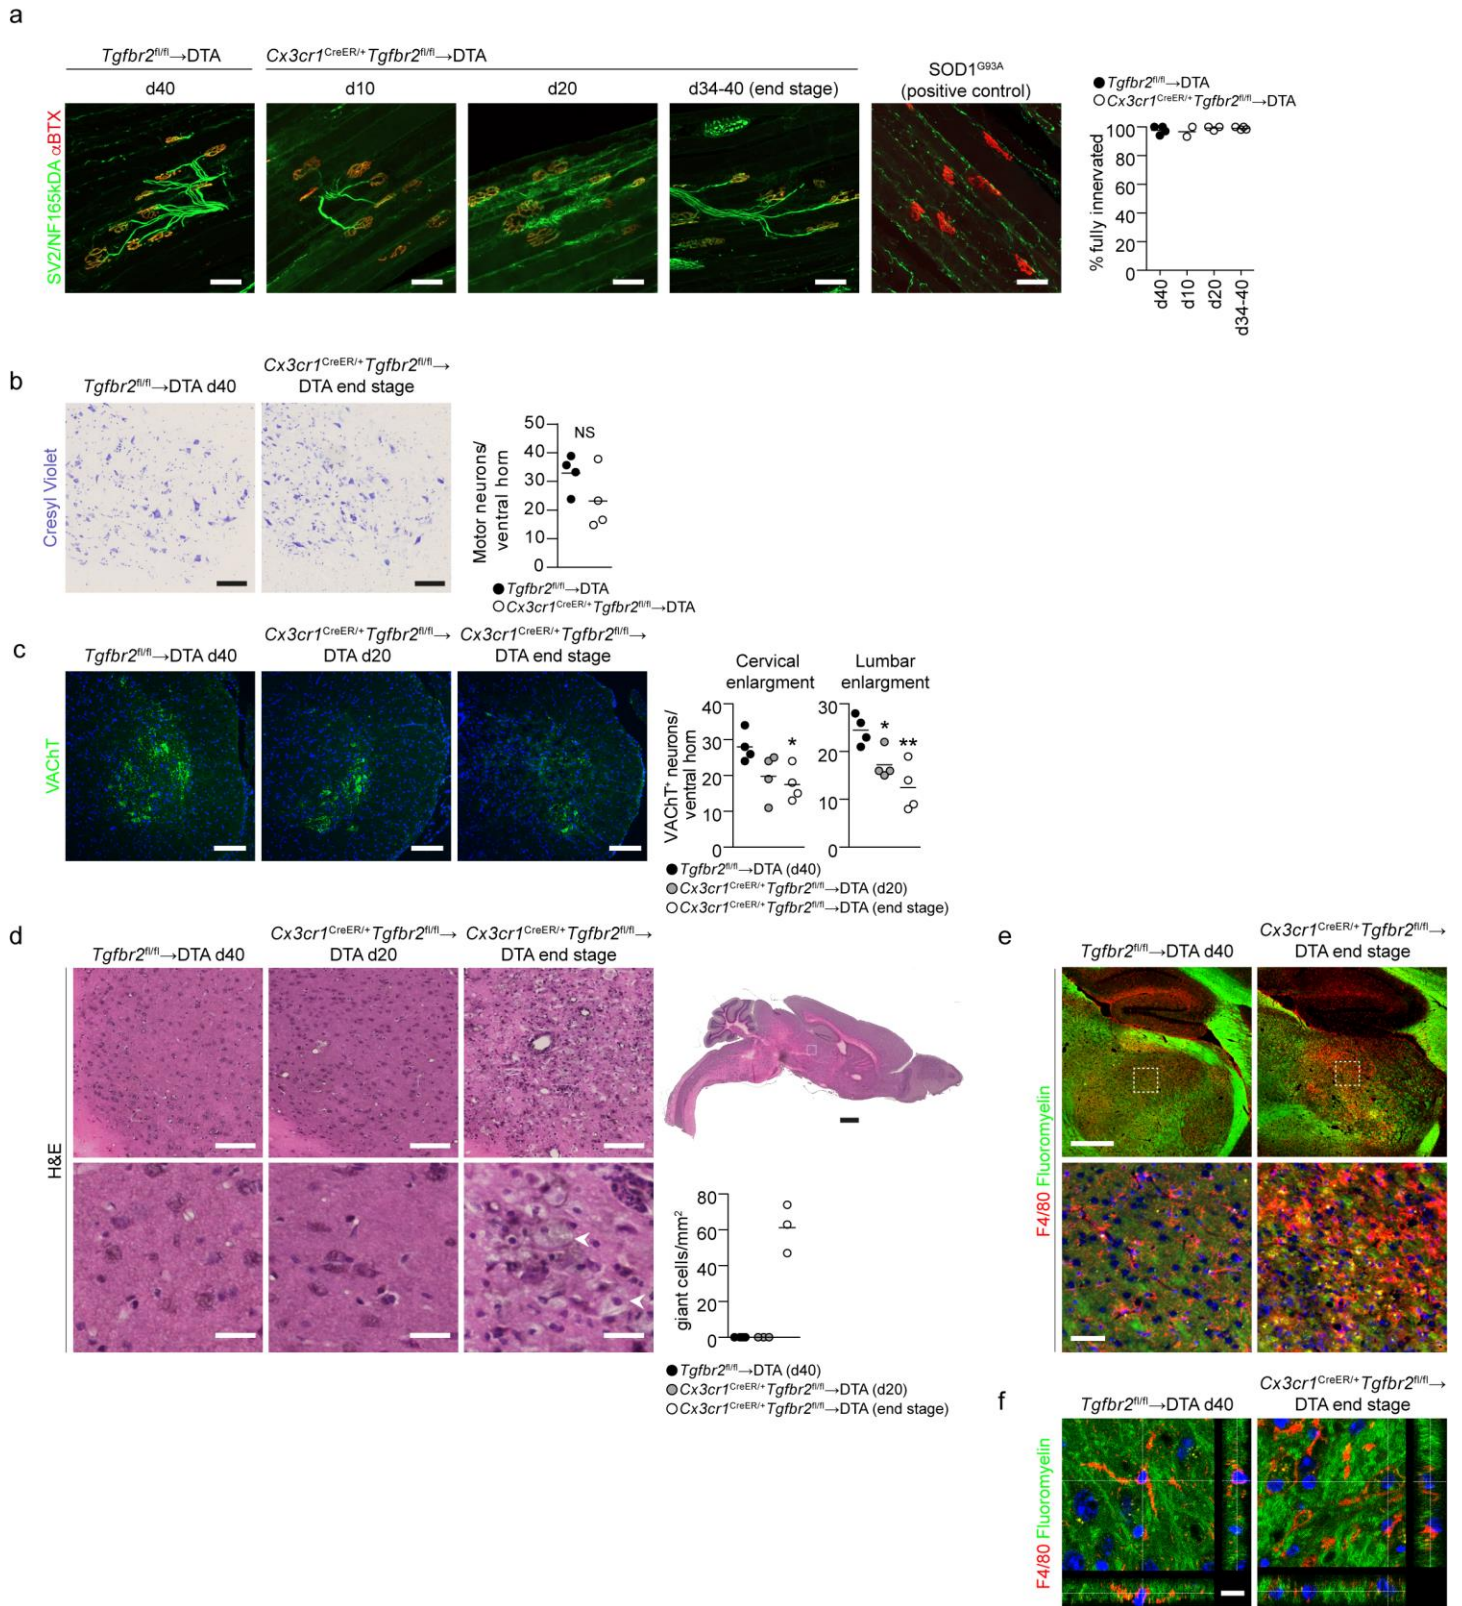

### Supplementary Figure 3

Analysis of lower motor neuron pathology and thalamic lesions in *Cx3cr1<sup>CreER/+</sup> Tgfb $\beta$ 2<sup>fl/fl</sup>* → DTA chimeras

(a) Analysis of innervation of neuromuscular junctions in the tibialis anterior muscle of *Tgfb $\beta$ 2<sup>fl/fl</sup>*→DTA and *Cx3cr1<sup>CreER/+</sup>* *Tgfb $\beta$ 2<sup>fl/fl</sup>*→DTA chimeras. Innervation was quantified by assessing overlay of synaptic vesicle protein (SV2) and neurofilament (NF) 165 kDA staining with  $\alpha$ -BTX labeled endplates. Positive control is tibialis anterior muscle from SOD<sup>G93A</sup> (day 140) mice illustrating complete denervation. Lines in graph are mean values of n = 4, 2, 3, 4 mice/group and at least 40 motor endplates/mouse. Scale bar 50 $\mu$ m. (b) Enumeration of cresyl violet stained motor neurons (>200 $\mu$ m<sup>2</sup>) in the dorsal horns of the cervical enlargement. Lines in graph are mean values of n=4 mice/group and at least 5 sections/mouse. NS=not significant P=0.1633 Student's two-tailed unpaired t-test. Scale bar 100 $\mu$ m. (c) Enumeration of VACHT<sup>+</sup> motor neurons in the ventral horns of the spinal cord. Representative images are taken from the lumbar enlargement. Lines are mean values of n= 4, 3, 4 mice and at least 4 sections/mouse. \* P= 0.0354 (cervical) and \* P=0.0487 \*\* P=0.0034 (lumbar) 1-way ANOVA Dunnett's Multiple Comparison test. Scale bar 200 $\mu$ m. (d) Hematoxylin and eosin staining visualizing lesions in the thalamus in end stage KO→DTA mice. Lesions were quantified based on the presence of giant cells (white arrow) with an area >150 $\mu$ m<sup>2</sup>. Lines are mean values of n=3 mice/group and 2 sections/mouse. Scale bar 100 $\mu$ m (top panel) and 25 $\mu$ m (bottom panel). (e) F4/80 and fluoromyelin staining in the thalamus. Images are representative of n=3 mice/group. Scale bar 500 $\mu$ m and 50 $\mu$ m. (f) Confocal images of F4/80 and fluoromyelin staining in the thalamus. Images are representative of n=3 mice/group. Scale bar 10 $\mu$ m.

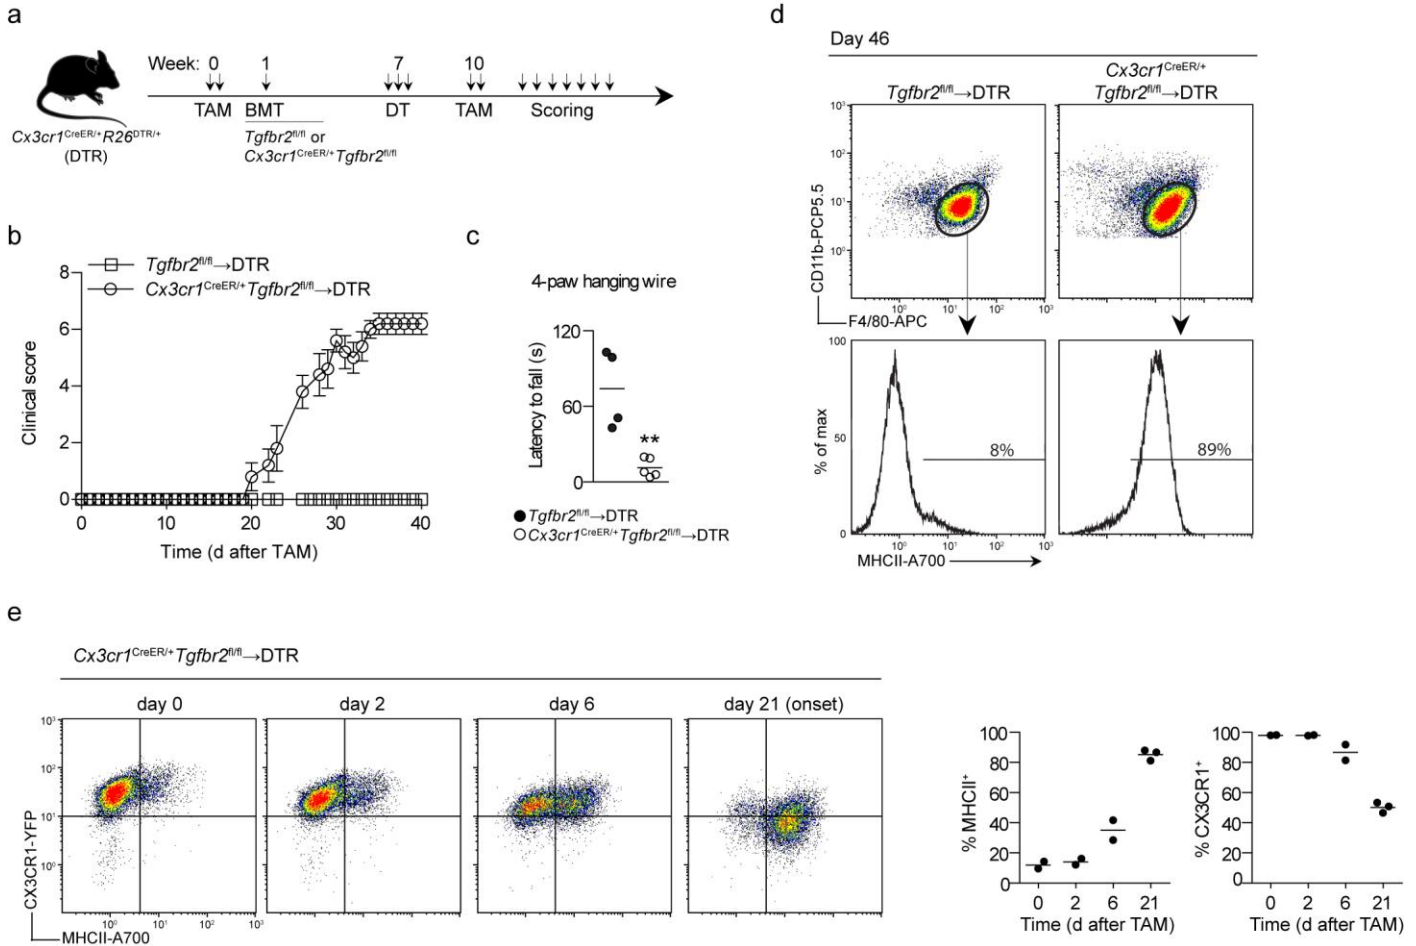

### Supplementary Figure 4

Loss of *Tgfb2* in CX3CR1<sup>+</sup> macrophages after niche colonization leads to onset of motor phenotype

(a) Experimental setup of *Cx3cr1<sup>CreER/+</sup> Tgfb2<sup>fl/fl</sup>→DTR* chimeras. DTR mice were given TAM (two doses, 48h apart) to recombine CNS-resident microglia, followed by irradiation and bone marrow transplantation (BMT) from *Tgfb2<sup>fl/fl</sup>* or *Cx3cr1<sup>CreER/+</sup> Tgfb2<sup>fl/fl</sup>* donors one week later. After reconstitution 6 weeks later, mice were given DT to deplete microglia. *Tgfb2* expression was targeted in repopulated CX3CR1<sup>+</sup> monocyte-derived macrophages 3 weeks later by TAM administration. (b) Clinical score assessing motor symptoms on the indicated days after TAM. Values in plot are mean±s.e.m. of n=4 and 5 mice. The experiment was performed once. (c) 4-paw hanging wire test to assess grip strength performed at onset of motor symptoms (day 20 after TAM). Lines are mean values of n=4 and 5 mice. \*\* P=0.0032. Student's two-tailed unpaired t-test. (d) Analysis of CNS by flow cytometry at day 46 (end stage). Top panel gated on CD11b<sup>+</sup>CD45<sup>+</sup>Ly6C<sup>-</sup>. The data is representative of n=2 mice/group. (e) Kinetic analysis of the transformation of monocyte-derived macrophages after TAM. Gated on CD11b<sup>+</sup>CD45<sup>+</sup>Ly6C<sup>-</sup>Ly6G<sup>-</sup>F4/80<sup>hi</sup>. Lines in graphs are mean values of n=2, 2, 2, 3 mice.

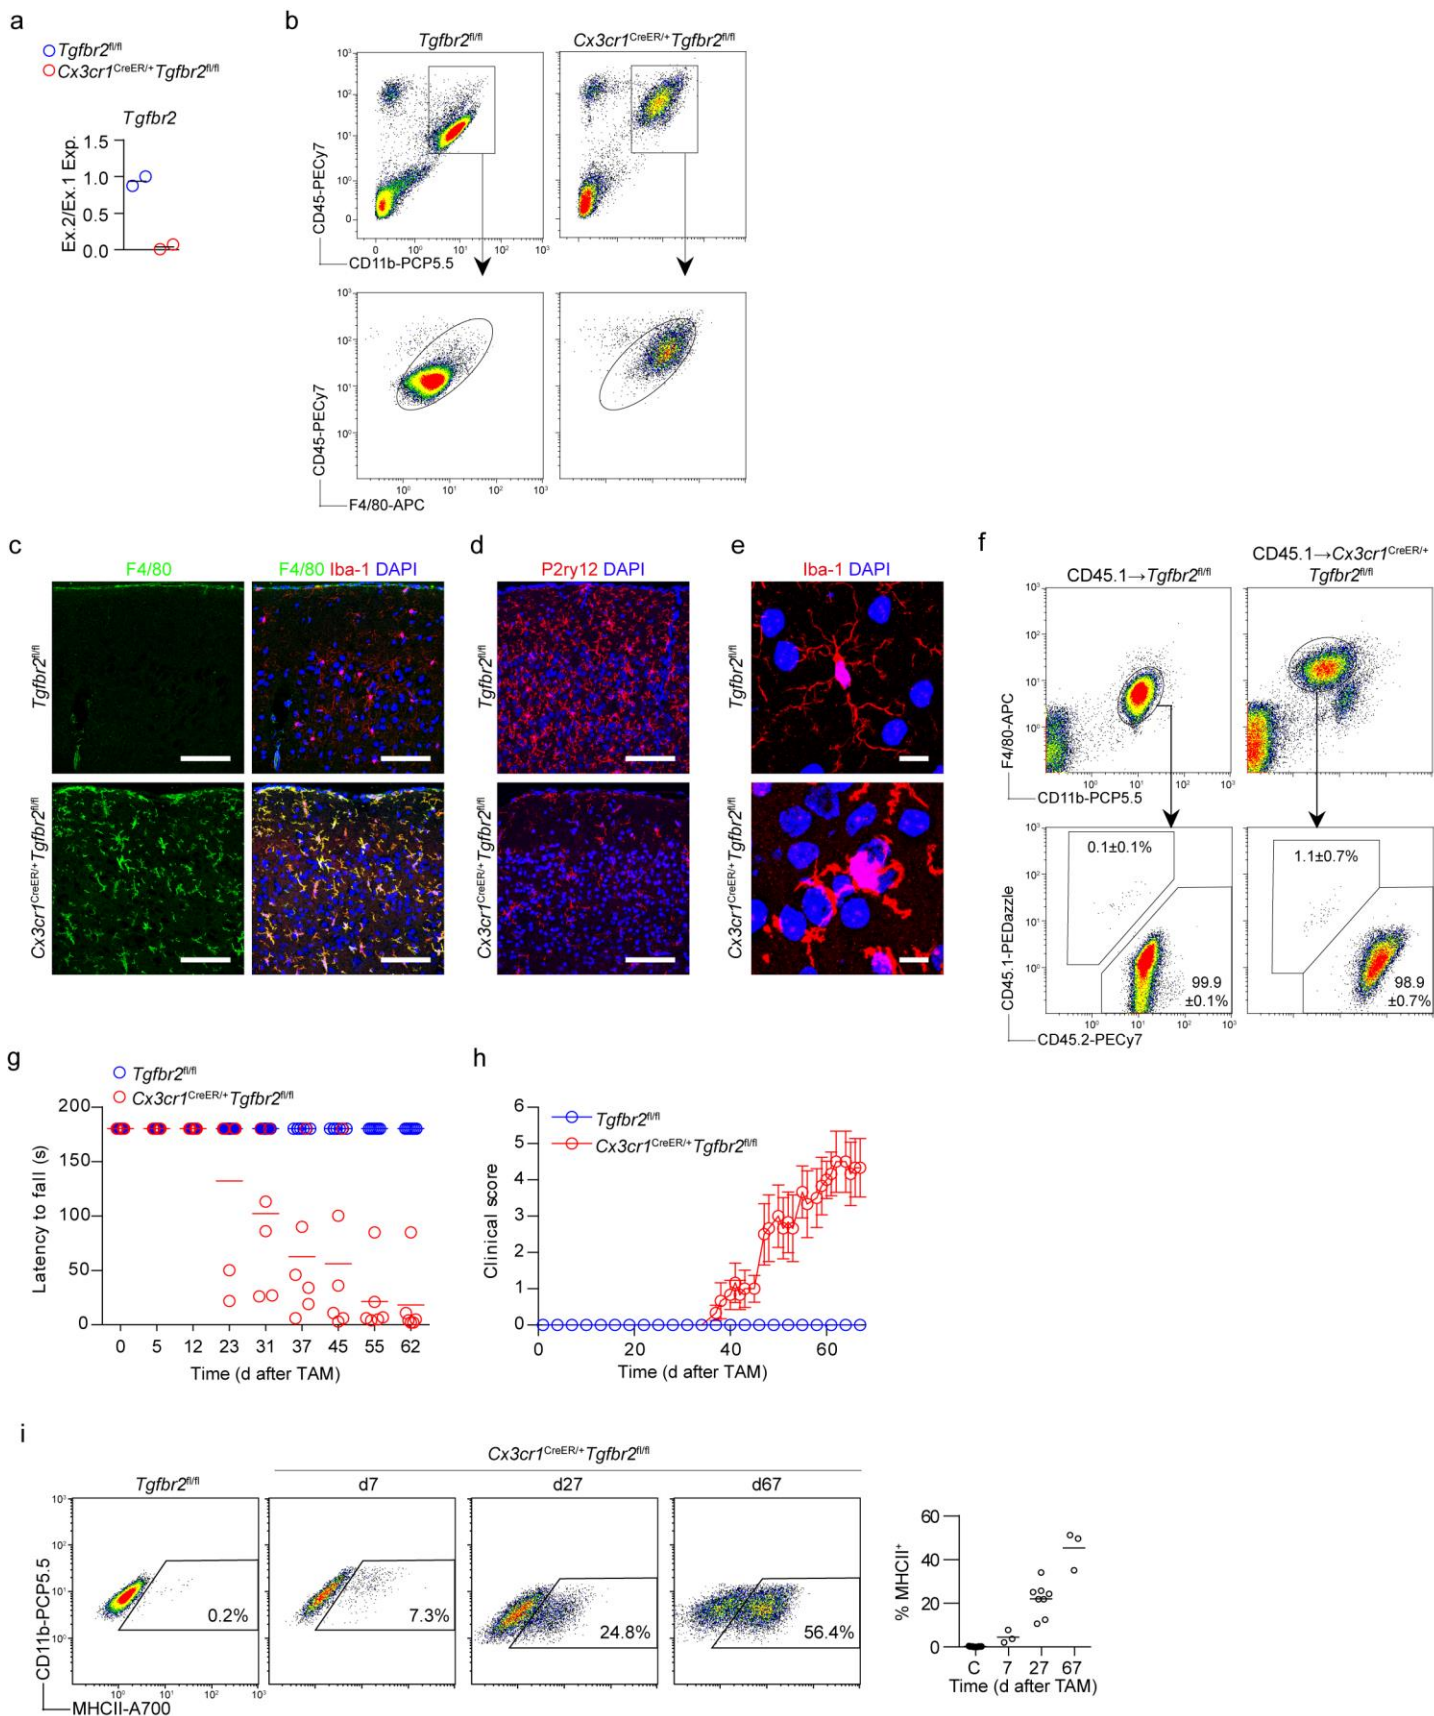

## Supplementary Figure 5

Loss of *Tgfb $\beta$ 2* in CNS-resident microglia leads to slowly progressing motor disease

(a) qRT-PCR analysis of sorted Ly6C<sup>+</sup>CD11b<sup>+</sup>F4/80<sup>low</sup> (*Tgfb $\beta$ 2*<sup>fl/fl</sup>) and Ly6C<sup>+</sup>CD11b<sup>+</sup>F4/80<sup>hi</sup> (*Cx3cr1*<sup>CreER/+</sup>*Tgfb $\beta$ 2*<sup>fl/fl</sup>) microglia day 7 after TAM. Deletion of *Tgfb $\beta$ 2* was assessed by the expression of the floxed exon 2 divided by the unfloxed exon 1. n=2 samples/group sorted from pools of 1-5 mice/sample. (b) CNS analysis by flow cytometry 7 days after TAM. Top panel is gated on live, singlet and Ly6C<sup>+</sup>Ly6G<sup>+</sup> cells. Dot plots are representative of three independent experiments. (c-d) Immunofluorescence for (c) F4/80 and Iba-1 or (d) P2ry12 in cortex day 7 after TAM. Images are representative of n=3 mice/group. Scale bar 100 $\mu$ m. (e) Confocal images of one Iba-1<sup>+</sup> microglial cell in the cortex to visualize morphology. Images are representative of n=3 mice/group. Scale bar 10 $\mu$ m. (f) CNS analysis of head-protected CD45.1 $\rightarrow$ *Cx3cr1*<sup>CreER/+</sup>*Tgfb $\beta$ 2*<sup>fl/fl</sup> chimeras analyzed 3 weeks after TAM administration. Top panel is gated on live, singlet and Ly6C<sup>+</sup>Ly6G<sup>+</sup> cells. Values in plots are mean $\pm$ s.d. of n=7 and 6 mice. The experiment was performed once. (g-h) Development of motor symptoms in n=7 *Tgfb $\beta$ 2*<sup>fl/fl</sup> and n=6 *Cx3cr1*<sup>CreER/+</sup>*Tgfb $\beta$ 2*<sup>fl/fl</sup> mice. (g) 4-paw hanging wire test to assess grip strength (max time 180 sec) performed on the indicated days after TAM. Lines represent mean values. (h) Clinical score assessing motor symptoms. Values are mean $\pm$ s.e.m. The experiment was performed once. (i) Time course analysis of MHCII surface expression on CD11b<sup>+</sup>CD45<sup>+</sup>Ly6C<sup>+</sup>Ly6G<sup>+</sup> microglia on the indicated days after TAM. Lines represent mean values of n=15, 3, 8, 3 mice.
